# Supplementary material for: Novel insights into surfactant protein C trafficking revealed through the study of a pathogenic mutant
Source: PubMed Central journal article supplement (PMC8792467; doi:10.1183/13993003.00267-2021), 2022-01-27
Supplement: ERJ-00267-2021.Figure_S4.pdf [file ERJ-00267-2021.Figure_S4.pdf]

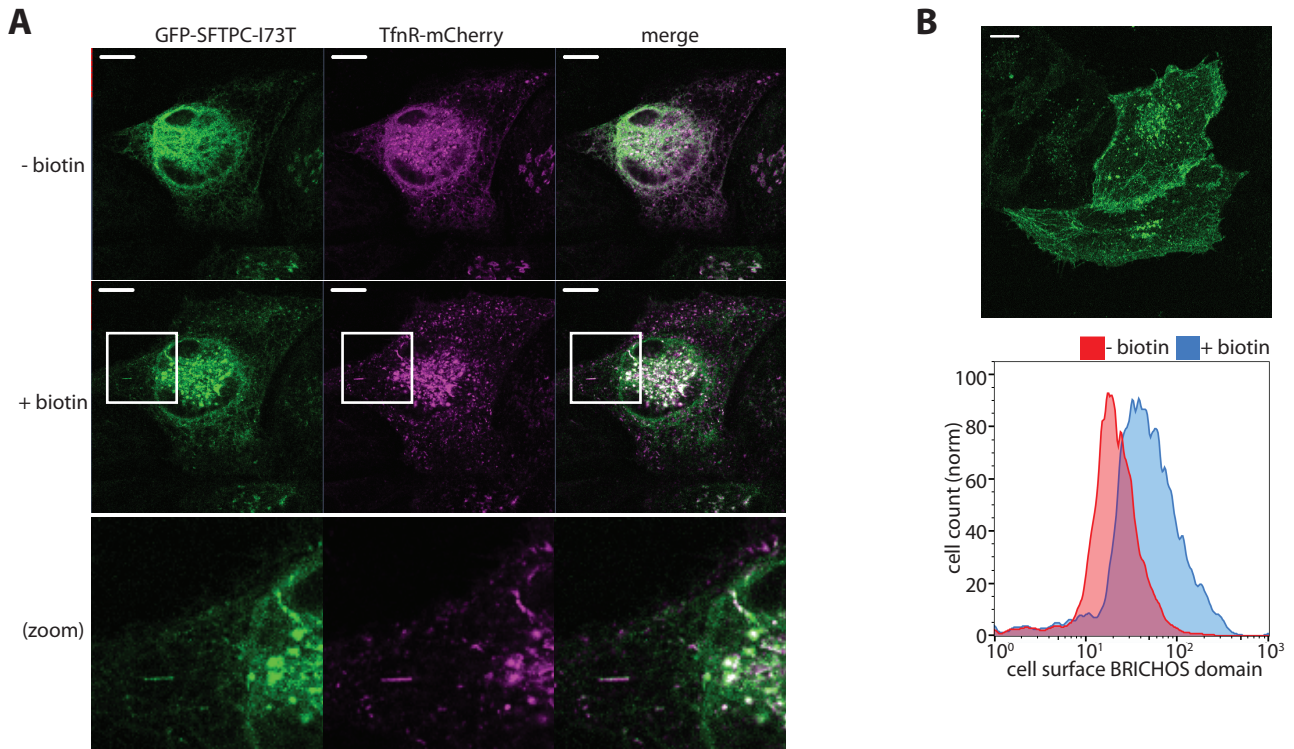

**Suppl fig 4. SFTPC-I73T, like SFTPC-WT is trafficked to the plasma membrane from early compartments. (A)** GFP-SFTPC-I73T RUSH vectors were co-expressed with TfnR-mCherry and treated with biotin before imaging in real time. Like SFTPC-WT, GFP-SFTPC-I73T traffics with TfnR in tubular structures. **(B)** After 2 hours of biotin exposure, GFP-SFTPC-I73T is visible at the plasma membrane; this is reflected in increased BRICHOS domain presence at the plasma membrane by flow cytometry. Scale bar = 10 $\mu$ m.
